# Supplementary material
Source: MDPI journal article supplement (https://www.mdpi.com/1996-1073/16/22/7492)
Supplement: s1 [file s1]

## Supplementary Material

**Table S1.** Population growth in the tropical climate regions in Mexico by size of population center from 1980 to 2050.

| year        | Size of population centers (inhabitants) |                  |                   | R <sup>2</sup> adjusted                       |
|-------------|------------------------------------------|------------------|-------------------|-----------------------------------------------|
|             | Rural                                    | Peri-urban       | Urban             |                                               |
| 1980        | 8,023,190                                | 2,558,578        | 4,142,450         | Rural=0.990<br>Peri-urban=0.98<br>Urban=0.996 |
| 1990        | 9,056,281                                | 3,383,737        | 6,532,060         |                                               |
| 2000        | 9,780,392                                | 4,078,202        | 8,605,378         |                                               |
| 2010        | 10,488,105                               | 4,877,022        | 10,607,576        |                                               |
| 2020        | 11,154,843                               | 5,413,067        | 12,221,174        |                                               |
| <b>2030</b> | <b>11,585,991</b>                        | <b>5,851,721</b> | <b>13,617,086</b> |                                               |
| <b>2040</b> | <b>11,955,023</b>                        | <b>6,245,739</b> | <b>14,857,283</b> |                                               |
| <b>2050</b> | <b>12,270,890</b>                        | <b>6,599,662</b> | <b>15,959,135</b> |                                               |

Bold letters are population projections. The unmarked letters are historical data obtained from the corresponding population censuses [1].

Due to the lack of disaggregated information from official sources, we calculated our own population growth projections of population centers by size. A simple linear regression was used due to lack of information on other variables needed to project growth more accurately.

The simple linear regression is based on the behavior of the historical data, which presented adjusted R<sup>2</sup> values greater than 0.900. For this reason, the projections are considered reliable. Additionally, comparing with the total population growth of the tropical climate region reported by CONAPO (Spanish acronym for National Population Council) projected to the year 2050 up to 34,712,336 inhabitants [2], our projections were 34,829,687 inhabitants, that is only 0.3% higher than CONAPO. Regarding growth by location type, our results show an increasing population tendency in urban areas and a decreasing tendency in rural areas, like the projections tendencies reported by the United Nations [3].

**Table S2.** Projection of the population growth in the tropical climate regions in Mexico from 2020 to 2050

| year | Projection of the population growth |            |            |
|------|-------------------------------------|------------|------------|
|      | Rural                               | Peri-urban | Urban      |
| 2020 | 11,154,843                          | 5,413,067  | 12,221,174 |
| 2021 | 11,197,958                          | 5,456,932  | 12,360,765 |
| 2022 | 11,241,073                          | 5,500,798  | 12,500,356 |
| 2023 | 11,284,187                          | 5,544,663  | 12,639,948 |
| 2024 | 11,327,302                          | 5,588,529  | 12,779,539 |
| 2025 | 11,370,417                          | 5,632,394  | 12,919,130 |
| 2026 | 11,413,532                          | 5,676,260  | 13,058,721 |
| 2027 | 11,456,646                          | 5,720,125  | 13,198,312 |
| 2028 | 11,499,761                          | 5,763,991  | 13,337,904 |
| 2029 | 11,542,876                          | 5,807,856  | 13,477,495 |
| 2030 | 11,585,991                          | 5,851,721  | 13,617,086 |
| 2031 | 11,622,894                          | 5,891,123  | 13,741,106 |
| 2032 | 11,659,797                          | 5,930,525  | 13,865,125 |
| 2033 | 11,696,701                          | 5,969,927  | 13,989,145 |
| 2034 | 11,733,604                          | 6,009,328  | 14,113,165 |
| 2035 | 11,770,507                          | 6,048,730  | 14,237,184 |
| 2036 | 11,807,410                          | 6,088,132  | 14,361,204 |
| 2037 | 11,844,314                          | 6,127,534  | 14,485,224 |
| 2038 | 11,881,217                          | 6,166,935  | 14,609,244 |
| 2039 | 11,918,120                          | 6,206,337  | 14,733,263 |
| 2040 | 11,955,023                          | 6,245,739  | 14,857,283 |
| 2041 | 11,986,610                          | 6,281,131  | 14,967,468 |
| 2042 | 12,018,197                          | 6,316,523  | 15,077,654 |
| 2043 | 12,049,783                          | 6,351,916  | 15,187,839 |
| 2044 | 12,081,370                          | 6,387,308  | 15,298,024 |
| 2045 | 12,112,957                          | 6,422,700  | 15,408,209 |
| 2046 | 12,144,543                          | 6,458,092  | 15,518,394 |
| 2047 | 12,176,130                          | 6,493,485  | 15,628,580 |
| 2048 | 12,207,717                          | 6,528,877  | 15,738,765 |
| 2049 | 12,239,303                          | 6,564,269  | 15,848,950 |
| 2050 | 12,270,890                          | 6,599,662  | 15,959,135 |

Note: Annual growth projections were obtained with our population growth calculations

## References

1. Instituto Nacional de Geografía y Estadística (INEGI) Censo de Población y Vivienda 2020 Available online: <https://www.inegi.org.mx/programas/ccpv/2020/#Microdatos> (accessed on 18 September 2023).
2. Consejo Nacional de población (CONAPO) Proyecciones de La Población de México y de Las Entidades Federativas 2016-2050 Available online: <https://datos.gob.mx/busca/dataset/proyecciones-de-la-poblacion-de-mexico-y-de-las-entidades-federativas-2016-2050> (accessed on 10 March 2021).
3. United Nations World Urbanization Prospects 2018 Available online: <https://population.un.org/wup/> (accessed on 16 August 2023).
